# Supplementary material for: RAS/PI3K Crosstalk and Cetuximab Resistance in Head and Neck Squamous Cell Carcinoma
Source: Oxford University Press journal article supplement (doi:10.1158/1078-0432.ccr-13-2721), 2014-04-03
Supplement: 10780432ccr132721-sup-fig5.pdf [file 10780432ccr132721-sup-fig5.pdf]

Figure S5

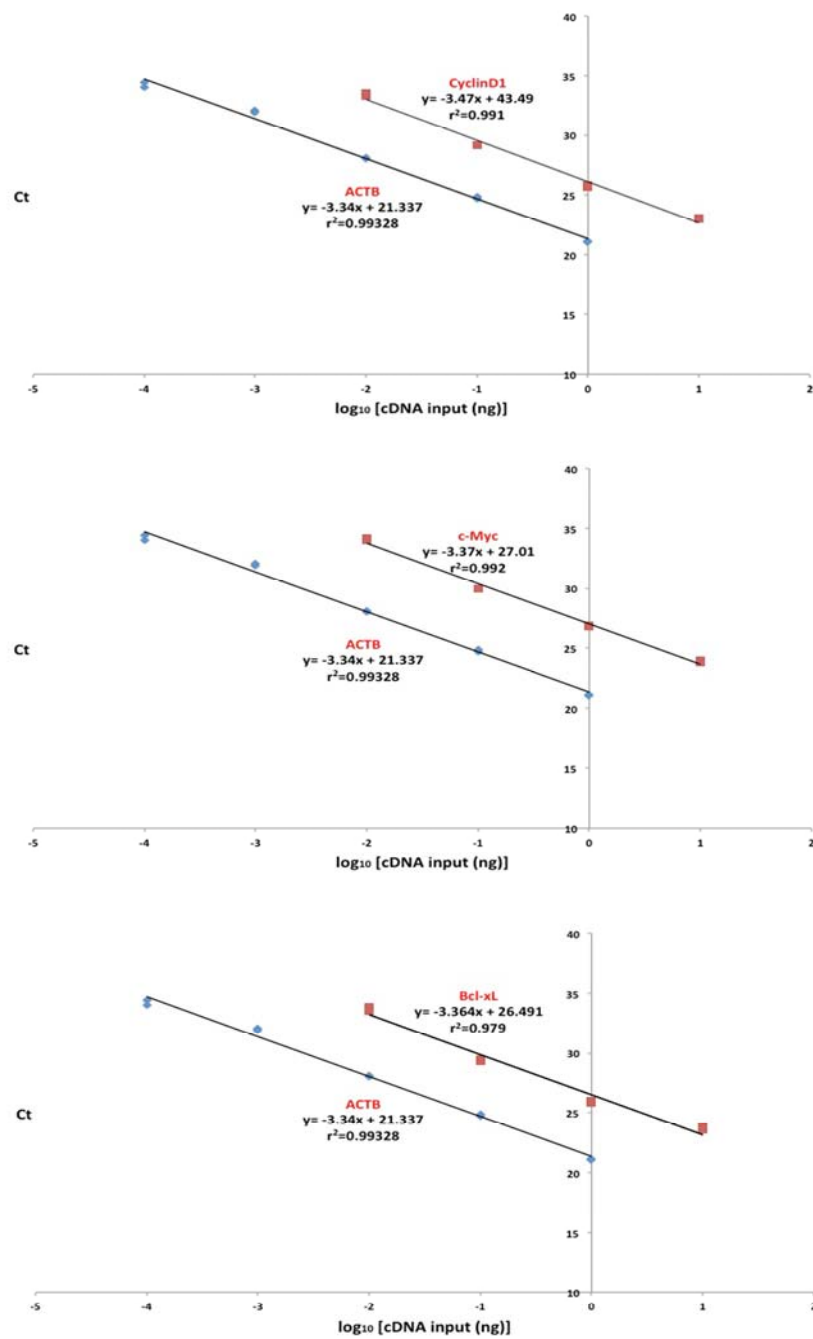

**Fig S5.** Validation of the comparative  $C_T$  ( $2^{-\Delta\Delta C_T}$ ) method. The efficiency of the amplification of the target genes (CyclinD1, c-Myc and Bcl-xL) and internal control (ACTB) was examined by means of real-time PCR and SYBR Green detection. With the use of reverse transcriptase, cDNA was synthesised from 2  $\mu$ g total RNA isolated from human BB49 cells. Serial dilutions of cDNA over a 100-fold range were amplified by real-time PCR using gene-specific primers. . The  $\Delta C_T$  was calculated for each cDNA dilution and plotted vs it.
